# Supplementary material for: Perceived effectiveness of four different cigarette health warning label themes among a sample of urban smokers and non-smokers in China
Source: HighWire-hosted journal article supplement (doi:10.1136/tobaccocontrol-2021-056703), 2021-08-16
Supplement: tobaccocontrol-2021-056703supp003_data_supplement.pdf [file tobaccocontrol-2021-056703supp003_data_supplement.pdf]

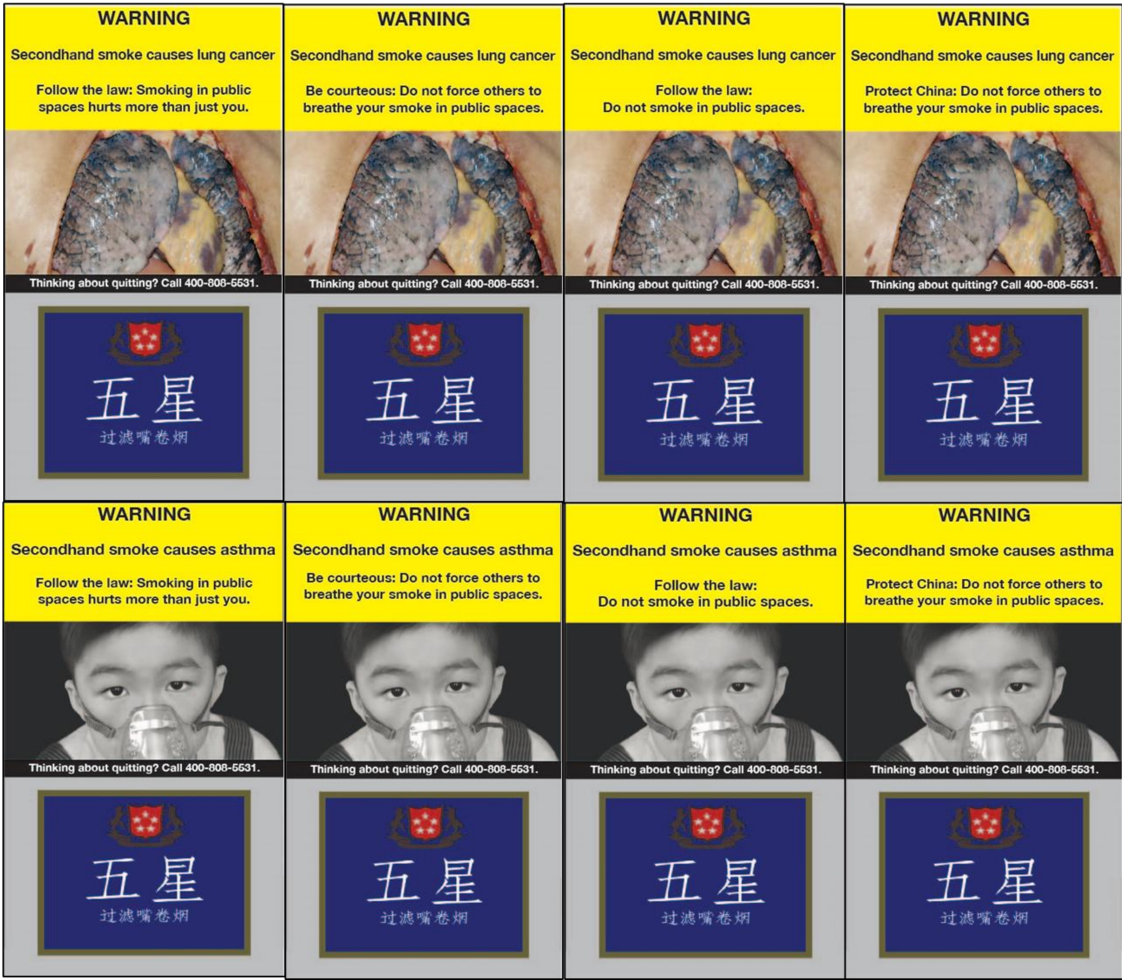

Figure A3. Reinforcing compliance with existing smoke-free policies themed health warning labels<sup>1</sup>

<sup>1</sup> The four pathology images on the top of the figure are from Dr. Prakit, Action on Smoking and Health Foundation, Thailand; and the four individual suffering images on the bottom are from © Her Majesty the Queen in Right of Canada, represented by the Minister of Health (2013).
